# Supplementary material for: A critical analysis of COVAX alliance and corresponding global health governance and policy issues: a scoping review
Source: PubMed Central journal article supplement — BMJ Glob Health. 2023 Oct 4;8(10):e012168. doi: 10.1136/bmjgh-2023-012168 (PMC10551961; doi:10.1136/bmjgh-2023-012168), 2023-10-04
Supplement: bmjgh-2023-012168supp001.pdf [file bmjgh-2023-012168supp001.pdf]

**DATA CHARTING FOR SCOPING REVIEW**

| SI No | Authors                | Year | Title                                                                                                                   | Methodology                                                              | Key findings-policy gaps                                                                      | Key findings-implementation gaps                                                                                                                                                                         |
|-------|------------------------|------|-------------------------------------------------------------------------------------------------------------------------|--------------------------------------------------------------------------|-----------------------------------------------------------------------------------------------|----------------------------------------------------------------------------------------------------------------------------------------------------------------------------------------------------------|
| 1     | Eccleston M et.al (12) | 2021 | International Collaboration to ensure Equitable access to Vaccines for COVID-19: The ACT Accelerator and COVAX Facility | Analysis of publicly available policy documents on COVAX and Literatures |                                                                                               | 1- COVAX facility failed to secure sufficient participation due to vaccine nationalism.<br>2- WHO Allocation system fails due to a lack of preparedness and vaccine utilization infrastructure in LMICs. |
| 2     | Liza M et.al (13)      | 2021 | COVAX must go beyond Proportional allocation of COVID vaccines to ensure fair and equitable access.                     | Analysis of COVAX Allocation mechanisms and suggesting alternative       | 1- Proportional allocation does not meet WHO's own ethical principles for vaccine allocation. |                                                                                                                                                                                                          |
| 3     | McAdams D et.al (14)   | 2020 | Incentivizing wealthy nations to participate in the COVID-                                                              | Analysis of COVAX documents and other literature.                        |                                                                                               | 1- Vaccine nationalism via bilateral agreements is the real threat to reaching global herd immunity                                                                                                      |

|   |                                 |      |                                                                                                               |                                                                                 |                                                                                                                                                                                                                               |                                                                                                                                                                                                    |
|---|---------------------------------|------|---------------------------------------------------------------------------------------------------------------|---------------------------------------------------------------------------------|-------------------------------------------------------------------------------------------------------------------------------------------------------------------------------------------------------------------------------|----------------------------------------------------------------------------------------------------------------------------------------------------------------------------------------------------|
|   |                                 |      | 19 on vaccine<br>Global access<br>facility<br>(COVAX): A<br>game theory<br>perspective                        |                                                                                 |                                                                                                                                                                                                                               | 2- COVAX's success or<br>failure depends on the<br>participation of wealthier<br>countries along with the<br>question of whether<br>bilateral deals end up<br>crowding up global<br>vaccine supply |
| 4 | Tania M<br>et.al (15)           | 2021 | Expert views<br>on COVAX<br>and Equitable<br>Global<br>Access to<br>COVID-19<br>vaccines.                     | In-depth<br>interviews<br>with experts<br>along with<br>literature<br>research. | 1- Proportional<br>allocation by WHO<br>ignores needs-based<br>considerations<br>2- Lack of<br>international<br>agreements on any<br>kind of capping the<br>bilateral deals.<br>3- lack of consensus<br>to tackle IPR issues  | 1- Less funding to the<br>COVAX facility than<br>required.<br>2- Lack of enough<br>technology transfer<br>3- Obstacles to<br>multilateralism- the<br>proliferation of bilateral<br>deals           |
| 5 | Florencia<br>Luna<br>et.al (16) | 2021 | Brief<br>communication<br>International<br>cooperation in<br>a non-ideal<br>world: the<br>example of<br>COVAX | Analysis of<br>COVAX<br>documents<br>and other<br>literature.                   | 1- WHO allocation<br>mechanism should be<br>need-based<br>2- No enforcement of<br>international<br>cooperation by<br>capping the bilateral<br>deals.<br>3-Lack of<br>transparency in<br>negotiation with<br>pharma industries | 1- Vaccine nationalism is<br>the major obstacle for<br>international cooperation                                                                                                                   |

|   |                  |      |                                                                         |                                                |                                                                                                                                                                                                                                                                                                                                                                                                                                                                                                          |                                                                                                                                                                                                           |
|---|------------------|------|-------------------------------------------------------------------------|------------------------------------------------|----------------------------------------------------------------------------------------------------------------------------------------------------------------------------------------------------------------------------------------------------------------------------------------------------------------------------------------------------------------------------------------------------------------------------------------------------------------------------------------------------------|-----------------------------------------------------------------------------------------------------------------------------------------------------------------------------------------------------------|
| 6 | Felix Stein (17) | 2021 | Risky business: COVAX and the financialization of global vaccine equity | Review of COVAX documents, in-depth interviews | <p>1- Enables members to strike bilateral deals (This weakened the COVAX).</p> <p>2- Supports pharma cooperates rather than working to force the prices down.</p> <p>3- Creation of COVAX AMC as a way to bypass the IPR issues.</p> <p>4- No contract details of AMC APAs.</p> <p>5- Adjustment of vaccination threshold of HIC, UMIC via COVAX from 20% to 50%. (Violation of Equity principles).</p> <p>6- COVAX didn't challenge IPR privileges of Pharma companies but instead subsidizes them.</p> | <p>1- Convincing wealthy countries to join COVAX.</p> <p>2- HICs hit vaccine deals with same companies COVAX was relying which causes further competition, eventually leading to less supply to COVAX</p> |
| 7 | Ann Usher (18)   | 2021 | How vaccine shortages change COVAX strategy                             | Review of COVAX documents and other literature | 1- COVAX was forced to distribute vaccines to HIC despite their bilateral deals. (Lack of vaccines to LMICS in constrained supply settings)                                                                                                                                                                                                                                                                                                                                                              | 1- Supply shortages to COVAX due to bilateral deals                                                                                                                                                       |

|    |                         |      |                                                   |                           |                                                                                                                                                                                                                                                                                                                                                                       |                                                                                                                                                                                                                                                                                                                                                                                                                       |
|----|-------------------------|------|---------------------------------------------------|---------------------------|-----------------------------------------------------------------------------------------------------------------------------------------------------------------------------------------------------------------------------------------------------------------------------------------------------------------------------------------------------------------------|-----------------------------------------------------------------------------------------------------------------------------------------------------------------------------------------------------------------------------------------------------------------------------------------------------------------------------------------------------------------------------------------------------------------------|
| 8  | Lancet Editorial (19)   | 2021 | Access to COVID-19 vaccines: Looking beyond COVAX |                           | 1- Different regions and countries have different vaccination targets. Also WHO target is different from COVAX supply targets.                                                                                                                                                                                                                                        | 1- Rich countries paid lip service to COVAX and brought up more vaccines from the market                                                                                                                                                                                                                                                                                                                              |
| 9  | Ann Usher (20)          | 2021 | A beautiful idea: How COVAX has fallen short      | World report              | 1- Optional purchase agreement- against equity principles(ceiling raised to 50% for HICs, made to lure HIC to join COVAX.<br>2- COVAX running short of vaccines, but still have to give one fifth to few rich countries.<br>3-COVAX lowered the SFC funding window (lack of funds)<br>4. Traditional aid financing approach for LMICs.<br>5. IP issues not addressed. | 1- COVAX didn't have funds to compete with HIC to procure vaccines due to vaccine nationalism.<br>2-COVAX rolls out slower in LMICs than HICs.<br>3- three dozen countries bypassed COVAX and made huge deals with manufacturers. So not enough SFCs joined to give the collective buying power expected by COVAX.<br>4- COVAX took time to convince HICs to join and weakened itself.<br>5- Lag in securing Finances |
| 10 | Katherin i T et.al (21) | 2021 | COVAX and dose sharing                            | Review of COVAX documents | 1- COVAX allocated vaccines to HICs despite shortage of                                                                                                                                                                                                                                                                                                               | 1- political reality is different that if HICs don't participate, the                                                                                                                                                                                                                                                                                                                                                 |

|    |                             |      |                                                                          |                                                |                                                                                                                                        |                                                                                                                                                                                                                                                        |
|----|-----------------------------|------|--------------------------------------------------------------------------|------------------------------------------------|----------------------------------------------------------------------------------------------------------------------------------------|--------------------------------------------------------------------------------------------------------------------------------------------------------------------------------------------------------------------------------------------------------|
|    |                             |      |                                                                          | and other literature                           | supply.<br>2- Needs based allocation mechanism                                                                                         | alliance would have completely collapsed.                                                                                                                                                                                                              |
| 11 | Siddharth Sharma et.al (22) | 2021 | WHO's allocation framework for COVAX: is it fair?                        | Review of COVAX documents and other literature | 1- WHO's fair allocation system is inadequate                                                                                          |                                                                                                                                                                                                                                                        |
| 12 | Katherini T et.al (23)      | 2021 | COVAX and the rise of Super-Public Private Partnership for global health | Review of COVAX documents and other literature | 1- Governance failure- 81 % of representatives from HICs and UMICs.<br>2- dose sharing mechanism- Only voluntary, with no enforcement. | 1- Vaccine nationalism undermined COVAX supply and purchasing power.<br>2- a long time for COVAX to make negotiations.<br>3. Instead of joining COVAX for procurement, HICs give money to COVAX AMC.<br>4- COVAX didn't get timely access to vaccines. |
| 13 | Antoine de et.al (24)       | 2021 | COVAX, vaccine donations and the politics of global vaccine inequity     | Review of COVAX documents and other literature | 1- No enforcement mechanisms.<br>2- Contractual impediments by pharma companies against donation and sharing of vaccines.              | 1- delayed delivery of vaccines to COVAX.<br>2- Vaccines arrived at short notice and short shelf life.<br>3- donations earmarked                                                                                                                       |

|    |           |          |                                             |                               |                                                                                         |                                                                                                                                                                                                                                                       |
|----|-----------|----------|---------------------------------------------|-------------------------------|-----------------------------------------------------------------------------------------|-------------------------------------------------------------------------------------------------------------------------------------------------------------------------------------------------------------------------------------------------------|
| 14 | GAVI (43) | 2021 NOV | Global Vaccination                          | GAVI official website article |                                                                                         | <p>1- Less vaccines available to LMICs.</p> <p>2- Booster doses and vaccine nationalism</p> <p>3- Wealthy countries monopolizing available vaccines</p> <p>4- Export restrictions hinder free flow of vaccines</p> <p>5- vaccine hoarding by HICs</p> |
| 15 | GAVI (40) | 2021 OCT | Health is a political choice                | GAVI official website article |                                                                                         | <p>1- Lag of delivering donated doses by HICs.</p> <p>2-Lack of transparency in manufacturing order books of Pharma companies as COVAX face delays and pushed to end of the queue</p>                                                                 |
| 16 | GAVI (53) | 2021 AUG | Intellectual property and COVID-19 vaccines | GAVI official website article | 1- COVAX supports more for technological transfer/sharing rather than the waiver of IPR | 1- Single biggest obstacle of COVAX- vaccine supply                                                                                                                                                                                                   |

|    |                       |      |                                        |                               |                                                                                                                                                                                                                                                                                                                 |                                                                                                                                                                                                                                                                                                                                                                                                                                      |
|----|-----------------------|------|----------------------------------------|-------------------------------|-----------------------------------------------------------------------------------------------------------------------------------------------------------------------------------------------------------------------------------------------------------------------------------------------------------------|--------------------------------------------------------------------------------------------------------------------------------------------------------------------------------------------------------------------------------------------------------------------------------------------------------------------------------------------------------------------------------------------------------------------------------------|
| 17 | GAVI WHITE PAPER (63) | 2021 | The future of global pandemic security | GAVI at UNGA 76               | <p>1- No international treaty to prevent vaccine hoarding.</p> <p>2- WTO failed to put an end to export bans during a pandemic.</p> <p>3- No waiver of IPR.</p> <p>4- Paying to pharma companies from public funds instead of sufficient technology sharing and local manufacturing.</p>                        | <p>1- Widespread vaccine nationalism and hoarding by wealthy countries.</p> <p>2- COVAX repeatedly deprioritized by the vaccine manufacturers at the end of the line.</p> <p>3- COVAX, since not a pre existing mechanism, took time to raise funds and support.</p> <p>4- Lack of funds at the initial stages of COVAX</p> <p>5- limited number of manufacturing facilities in the world that too predominantly in global north</p> |
| 18 | GAVI (52)             | 2021 | The G20 Must Recommit to COVAX         | GAVI official website article | <p>1- COVAX facility ought to be able to negotiate and buy its own doses. It was never meant to be a platform for donation. But as vaccine hoarding was more, COVAX relied more on donations from HICs.</p> <p>2- HICs acted only on national priority basis paying lip service to notion of Global vaccine</p> | <p>1- COVAX inability to access doses early owes to- time lag in funding so that wealthy countries locked up all the early vaccine supplies, Export bans, difficulties to upscale manufacturing.</p> <p>2- Even though COVAX has legally binding agreements with vaccine manufacturers, the facility suffered too much delay in accessing them due to lack of</p>                                                                    |

|    |                     |      |                                       |                                                   |                                                                                                                                                                                                                             |                                                                                                                                                           |
|----|---------------------|------|---------------------------------------|---------------------------------------------------|-----------------------------------------------------------------------------------------------------------------------------------------------------------------------------------------------------------------------------|-----------------------------------------------------------------------------------------------------------------------------------------------------------|
|    |                     |      |                                       |                                                   | equity.<br>3- COVAX was obliged to provide doses to richer nations owing to the structure and arrangement made by COVAX Facility even when the facility faced serious supply constraints.                                   | transparency in 'order books'                                                                                                                             |
| 19 | GAVI (44)           | 2021 | Sharing of COVID-19 vaccines          | GAVI official website article                     | 1- Earmarking of shared doses by HICs is contradictory to COVAX principles                                                                                                                                                  | 1- The second wave in India caused reallocation of vaccines from SII to domestic usage and COVAX faced a shortfall of 190 million doses in June-July 2021 |
| 20 | Holzer F et.al (25) | 2021 | Equitable access to COVID-19 vaccines | Analysis of COVAX documents and other literature. | 1- Nation states are allowed to negotiate multiple APAs forgoing the participation in COVAX.<br>2- No global governance mechanism coordinating or sanctioning non cooperating countries in distributive schemes like COVAX. |                                                                                                                                                           |



|    |                     |      |                                                           |                                                   |                                                                                                                                                                          |                                                                                                                                                                       |
|----|---------------------|------|-----------------------------------------------------------|---------------------------------------------------|--------------------------------------------------------------------------------------------------------------------------------------------------------------------------|-----------------------------------------------------------------------------------------------------------------------------------------------------------------------|
|    |                     |      |                                                           |                                                   | 3- MICs are in a difficult position as they are not poor enough to get donations nor have enough purchasing power to buy their own vaccines.                             |                                                                                                                                                                       |
| 21 | Ingrid T et.al (42) | 2021 | From vaccine nationalism to vaccine equity                | Analysis of COVAX documents and other literature. | 1- Vaccine nationalism gives the flawed view of GH and Global economy where vaccines and medications are treated as market commodities rather than public goods.         |                                                                                                                                                                       |
| 22 | Maturitas (26)      | 2021 | Global challenges in distribution of vaccines             | Analysis of COVAX documents and other literature. |                                                                                                                                                                          | 1- Limited manufacturing facilities around the world which is skewed towards HICs                                                                                     |
| 23 | Oliver J et.al (27) | 2021 | Challenges in ensuring global access to COVID-19 vaccines | Analysis of COVAX documents and other literature. | 1- The logic of COVAX- no country should vaccinate more than 20% of their population until all countries have vaccinated 20% of the population. Is it even possible that | 1- Highly concentrated state of global vaccine manufacturing capacity in global north.<br>2- Scarcity in supply.<br>3- Large volumes of pre-orders by rich countries. |

|    |                     |      |                                                                     |                                                   |                                                                                                                                                                                                                           |                                                                                                                                           |
|----|---------------------|------|---------------------------------------------------------------------|---------------------------------------------------|---------------------------------------------------------------------------------------------------------------------------------------------------------------------------------------------------------------------------|-------------------------------------------------------------------------------------------------------------------------------------------|
|    |                     |      |                                                                     |                                                   | HICs will agree to this?                                                                                                                                                                                                  | 4- vaccine nationalism.<br>5- Concerns about reliability of COVAX on timely vaccine supply leading to more self procurement by countries. |
| 24 | Ann Usher (28)      | 2021 | CEPI and lack of transparency                                       | Analysis of COVAX documents and other literature. | 1- Lack of transparency in negotiations with pharma companies.<br>2-CEPI negotiates for R&D and GAVI negotiates for prices and doses. In a pandemic, HICs are not price sensitive, so GAVI has little power to negotiate. |                                                                                                                                           |
| 25 | Okereke M (59)      | 2021 | Should big pharma waive IPR for COVID-19 vaccines?                  | Analysis of COVAX documents and other literature. | 1- IPR on COVID-19 vaccines unfair as it was mostly funded by taxpayers money. Lack of waiver of IPR obstructs the timely access to affordable vaccines.                                                                  |                                                                                                                                           |
| 26 | Reider K et.al (41) | 2021 | Balancing national and international responsibilities in allocating | Analysis of COVAX documents and other literature. | 1- In reality, will HICs agree to wait to vaccinate their population until                                                                                                                                                |                                                                                                                                           |

|    |                      |      |                                                                                                                     |                                                   |                                                                                                                                                               |                                         |
|----|----------------------|------|---------------------------------------------------------------------------------------------------------------------|---------------------------------------------------|---------------------------------------------------------------------------------------------------------------------------------------------------------------|-----------------------------------------|
|    |                      |      | COVID-19 vaccines                                                                                                   |                                                   | HCWs or LICs have been immunized?                                                                                                                             |                                         |
| 27 | Li du et.al (46)     | 2021 | Advance vaccine production in LMIC                                                                                  | Analysis of COVAX documents and other literature. | 1- discrepancy between vision of supporting COVID-19 vaccines as public goods Vs the reality of access of LMIC to patented technology and relevant knowledge. | 1- Less manufacturing capacity of LMICs |
| 28 | Zhehan Li et.al (29) | 2021 | The Inefficient and Unjust Global Distribution of COVID-19 Vaccines: From a Perspective of Critical Global Justice. | Analysis of COVAX documents and other literature. | 1- COVAX has no sufficient enforcement power to make governments take collective binding actions                                                              |                                         |

|    |                   |      |                                                                                 |                                                   |                                                                                                                                                                                                                                                                                                                                                                                                                                                |                                                                                                                                                                                                                                                                                   |
|----|-------------------|------|---------------------------------------------------------------------------------|---------------------------------------------------|------------------------------------------------------------------------------------------------------------------------------------------------------------------------------------------------------------------------------------------------------------------------------------------------------------------------------------------------------------------------------------------------------------------------------------------------|-----------------------------------------------------------------------------------------------------------------------------------------------------------------------------------------------------------------------------------------------------------------------------------|
| 29 | Iris Borowy (45)  | 2021 | Perspectives on COVID-19 vaccines- The incredible success vs incredible failure | Analysis of COVAX documents and other literature. | <p>1- COVAX FW stayed within the conventional forms by keeping the IPR intact.</p> <p>2- Vaccines are priced only for profit maximization and cost recovery.</p> <p>3- IP creates barrier to the production and distribution of affordable drugs in global south</p> <p>4- Bilateral deals promised early supply to countries and COVAX became additional bidder for contracts with pharma companies instead of a coordinating institution</p> | <p>1- The USA under the Trump administration didn't join COVAX which resulted in initial lack of funding.</p> <p>2- More funding to national programs than COVAX (vaccine nationalism).</p> <p>3- Vaccine donations faced logistical challenges- example Pfizer requires UCC.</p> |
| 30 | Marguerite M (30) | 2021 | COVID-19 vaccines access in Africa                                              | Analysis of Literature                            | <p>1- Market dominance of few nations undermined COVAX.</p> <p>2- COVAX FW was based on philanthropy and will of wealthier nations that will not lead to equitable and fair</p>                                                                                                                                                                                                                                                                | <p>1- Despite being financially committed to COVAX, HICs have prioritized national access over global equity- that depleted supply for LMICs.</p> <p>2- Export restrictions of</p>                                                                                                |

|    |                                                                         |      |                                                   |                        |                                                                                                                             |                             |
|----|-------------------------------------------------------------------------|------|---------------------------------------------------|------------------------|-----------------------------------------------------------------------------------------------------------------------------|-----------------------------|
|    |                                                                         |      |                                                   |                        | access to vaccines<br>3-Aims to allocate doses for 20% of population which is far less to achieve herd immunity             | vaccines and raw components |
| 31 | Int AIDS society with Lancet Commission on health and human rights (61) | 2021 | Human rights and Fair access to COVID-19 vaccines | Analysis               | 1- The target of COVAX 20 % is insufficient to reach any control over transmission. Will any wealthy country agree to this? |                             |
| 32 | safura abdul karim (62)                                                 | 2021 | COVID-19 vaccines accessibility and affordability | Analysis               | 1- No mechanisms for Vaccine price controls or regulations that would cap or set the prices                                 |                             |
| 33 | Kyle Ferguson et.al (56)                                                | 2021 | Love thy neighbor?                                | Analysis of Literature | 1- Despite cosmopolitan view of justice, the relevant actors in COVAX facility are nation-states                            |                             |

|    |                         |      |                                                                          |                                                   |                                                                                                                                                                                                                                                                                             |                             |
|----|-------------------------|------|--------------------------------------------------------------------------|---------------------------------------------------|---------------------------------------------------------------------------------------------------------------------------------------------------------------------------------------------------------------------------------------------------------------------------------------------|-----------------------------|
| 34 | Xiolfan fu et.al (46)   | 2021 | The world has a unique opportunity                                       | Analysis of COVAX documents and other literature. |                                                                                                                                                                                                                                                                                             | 1- Lack of Funding to COVAX |
| 35 | Hans Morten Haugen (51) | 2021 | Does the TRIPS aspect of IPR prevent COVID-19 vaccines as a public good? | Analysis of TRIPS agreement and other literature  | 1- No international treaties to specify rights and obligations in the context of global public goods                                                                                                                                                                                        |                             |
| 36 | Bawa singh et.al (31)   | 2021 | COVID-19 and Global distributive health                                  | Analysis of TRIPS agreement and other literature  | 1- TRIPS are one of the major barriers of health care equity.<br>2- IPR patenting is the major obstacle for developing countries' vaccine manufacturers to enter the market.<br>3- The lack of availability of vaccines and medicines to LMICs question the global health governance system |                             |

|    |                             |      |                                                                  |                        |                                                                                                                                                                                                                                                                                                               |                                                                                                          |
|----|-----------------------------|------|------------------------------------------------------------------|------------------------|---------------------------------------------------------------------------------------------------------------------------------------------------------------------------------------------------------------------------------------------------------------------------------------------------------------|----------------------------------------------------------------------------------------------------------|
| 37 | Alexandra Phelen et.al (31) | 2021 | Legal agreements: barriers and enablers of global vaccine equity | Analysis               | 1- failed to address the potential impact of IP rights on pandemic vaccines.<br>2- No international treaty agreed to all WHO members for COVID-19 vaccines.<br>3- No public international agreement on distribution of vaccines.<br>4- COVAX has no transparency of the negotiated prices with manufacturers. |                                                                                                          |
| 38 | Fatima Hassan et.al (57)    | 2021 | Pandemic profiteering - crime against humanity                   | Analysis of Literature | 1- Pandemic profiteering is a human rights violation.<br>2- Basic problems - Free market, profit driven enterprise based on patent and IPR protection, lack of political will                                                                                                                                 |                                                                                                          |
| 39 | Parsa Efrani et.al (47)     | 2021 | IP waiver for COVID-19 vaccines                                  | Analysis               | 1- Market driven by profit margins, not public health.<br>2- WHO C-TAP - no one shared IP protected vaccine                                                                                                                                                                                                   | 1- Accumulation of vaccines by HICs.<br>2-Restricted vaccine production by small number of manufacturers |

|    |                                 |      |                                                |                        |                                                                                                                                                                                                               |                                                                                                                                                                                                                                                                                                                           |
|----|---------------------------------|------|------------------------------------------------|------------------------|---------------------------------------------------------------------------------------------------------------------------------------------------------------------------------------------------------------|---------------------------------------------------------------------------------------------------------------------------------------------------------------------------------------------------------------------------------------------------------------------------------------------------------------------------|
|    |                                 |      |                                                |                        | information.<br>3- No support for IP waiver from HICs and vaccine manufacturers                                                                                                                               |                                                                                                                                                                                                                                                                                                                           |
| 40 | Georgios Kalaitzidis (38)       | 2021 | Equitable vaccine distribution-obstacles       | Analysis of Literature | 1- Failure of developed world to have a structured ethical FW for COVID-19 vaccine allocation and distribution                                                                                                |                                                                                                                                                                                                                                                                                                                           |
| 41 | Saharfa Sekalala (54)           | 2021 | Decolonizing HR: IP and COVID-vaccines         | Analysis               | 1- COVAX was reduced to a charity platform, a far cry from human rights based one.                                                                                                                            |                                                                                                                                                                                                                                                                                                                           |
| 42 | Elizabeth F peacocke et.al (39) | 2021 | Influence factors of equitable access of LMICs | Analysis               | 1- challenging the role of patent holders who determine the distribution of vaccines.<br>2- Global governance issue- power rest with few pharma companies controlling the supply and distribution of vaccines | 1- Lack of political and financial commitments.<br>2- Limited knowledge sharing from Vaccine manufacturers.<br>3- HICs bilaterally donated vaccines.<br>4- USA invoked the Defense production Act which reduces the active pharma ingredient for AZ manufacture.<br>5-COVAX pooled purchase APAs faced funding challenges |



|    |                           |      |                                                       |          |                                                                                                     |                                                                   |
|----|---------------------------|------|-------------------------------------------------------|----------|-----------------------------------------------------------------------------------------------------|-------------------------------------------------------------------|
| 43 | Sudhan Rakimut hu (64)    | 2021 | COVID-19 vaccine inequity amidst booster doses        | Analysis | Current global health architecture and existing regulations are inefficient to safeguard equity     |                                                                   |
| 44 | Shanti mendis (55)        | 2021 | Regional vaccine production is key to ensuring equity | Analysis | 1- COVAX AMC depends on donations.<br>2- no waiver for IPR and patents.                             |                                                                   |
| 45 | Fredinand C (33)          | 2021 | Asylum seekers and vaccine                            | Analysis | 1- Under representation of IOM and CSOs in COVAX                                                    |                                                                   |
| 46 | Ilona kickbush et.al (34) | 2021 | Can geopolitics derail pandemic treaty                | Analysis | 1- COVAX weakened by IPR                                                                            | 1- states and companies preferred negotiations between them only. |
| 47 | UNHCR (61)                | 2021 |                                                       |          | 1- Private profit is prioritized over public health.<br>2-No IPR waiver                             |                                                                   |
| 48 | UN ECOSO C (35)           | 2021 |                                                       |          | 1- Vaccine nationalism breached the extraterritorial obligations of states.<br>2- IP rules of TRIPS | 1- Vaccine nationalism resulted in shortage of vaccines           |

|    |                               |                 |                                         |                               |                                                                                                                                                    |                                                                                                                                     |
|----|-------------------------------|-----------------|-----------------------------------------|-------------------------------|----------------------------------------------------------------------------------------------------------------------------------------------------|-------------------------------------------------------------------------------------------------------------------------------------|
|    |                               |                 |                                         |                               | agreement make it difficult to achieve international cooperation.                                                                                  |                                                                                                                                     |
| 49 | Eduardo A. Rueda-Barrera (47) | 2021            | The waiver of COVID-19 vaccine patents: | Analysis                      | 1- COVAX 20% target don't stop transmission                                                                                                        | 1- Dependency on most affordable AZ vaccine- India's second wave caused supply delay                                                |
| 50 | Kim JH et.al (36)             | 2021            | OVS USA                                 | Analysis                      |                                                                                                                                                    | 1- Purchases by USA, Japan, EU and Canada of 8.8 billion doses undermined COVAX negotiating ability with companies to reduce costs. |
| 51 | GAVI (37)                     | 2021            | COVAX slot swapping                     |                               | 1- Companies decide how to prioritize supply between each government.<br>2- The order of the queue or criteria for prioritization- not made public | 1- Wealthier countries ahead in queue causing delays to supply to COVAX                                                             |
| 52 | GAVI (63)                     | 2021            | Pandemic preparedness                   |                               |                                                                                                                                                    | 1- Limited supply capacity in Global distribution of vaccines                                                                       |
| 53 | GAVI (48)                     | 2021<br>AU<br>G | Booster doses                           | GAVI official website article |                                                                                                                                                    | 1- Many of the HICs started booster doses                                                                                           |
