# Supplementary material for: A critical analysis of COVAX alliance and corresponding global health governance and policy issues: a scoping review
Source: PubMed Central journal article supplement — BMJ Glob Health. 2023 Oct 4;8(10):e012168. doi: 10.1136/bmjgh-2023-012168 (PMC10551961; doi:10.1136/bmjgh-2023-012168), 2023-10-04
Supplement: bmjgh-2023-012168supp002.pdf [file bmjgh-2023-012168supp002.pdf]

The search keywords were as follows:

**Table 1: Search blocks and Keywords**

| <b>Search Blocks</b>           | <b>Keywords</b>                        |
|--------------------------------|----------------------------------------|
| COVAX Alliance                 | COVAX                                  |
| COVID-19 vaccine equity        | (COVID 19 vaccine) AND (Equity)        |
| COVID-19 vaccine diplomacy     | (COVID 19 vaccine) AND (diplomacy)     |
| COVID-19 vaccine accessibility | (COVID 19 vaccine) AND (Accessibility) |
| COVID-19 vaccine affordability | (COVID 19 vaccine) AND (affordability) |
| COVID-19 vaccines in LMICs     | (COVID 19 vaccine) AND (LMIC)          |
| Hoarding of COVID-19 vaccines  | (COVID 19 vaccine) AND (Hoarding)      |

|                     |                              |
|---------------------|------------------------------|
| Vaccine nationalism | (COVID 19) AND (Nationalism) |
|---------------------|------------------------------|

## SEARCH STRATEGY- DATABASES

| Search Blocks           | Keywords                                | PubMed | Scopus | Springer | Embase | Total Results |
|-------------------------|-----------------------------------------|--------|--------|----------|--------|---------------|
| COVAX                   | COVAX                                   | 48     | 184    | 148      | 95     | 475           |
| COVID 19 VACCINE-EQUITY | (COVID 19 vaccine) AND (Equity)         | 271    | 313    | 670      | 180    | 1434          |
| DIPLOMACY               | (COVID 19 vaccine) AND (diplomacy)      | 19     | 43     | 74       | 31     | 167           |
| ACCESSIBILITY           | (COVID 19 vaccine) AND (Accessibility), | 889    | 278    | 787      | 131    | 2085          |
| AFFORDABILITY           | (COVID 19 vaccine) AND (affordability)  | 199    | 30     | 201      | 31     | 461           |
| LMIC                    | (COVID 19 vaccine) AND (LMIC)           | 12     | 29     | 143      | 21     | 205           |
| HOARDING                | (COVID 19 vaccine) AND (Hoarding)       | 3      | 8      | 84       | 8      | 103           |
| NATIONALISM             | (COVID 19)AND (Nationalism)             | 4      | 61     | 123      | 43     | 231           |
| TOTAL                   |                                         | 1445   | 946    | 2227     | 540    | 4686          |

The specific concerns for each of the above-mentioned themes of implementation challenges of COVAX are elaborated and are presented in the tables below:

**Table 6: Themes of implementation challenges and specific concerns**

| Implementation challenges- Themes | Specific concerns | Number of evidence |
|-----------------------------------|-------------------|--------------------|
|-----------------------------------|-------------------|--------------------|

|                     |                                                                                                                                                                                       |    |
|---------------------|---------------------------------------------------------------------------------------------------------------------------------------------------------------------------------------|----|
| Vaccine nationalism | <ul style="list-style-type: none"><li>● The COVAX facility failed to secure sufficient participation due to vaccine nationalism.</li></ul>                                            | 2  |
|                     | <ul style="list-style-type: none"><li>● Bilateral deals end up crowding up global vaccine supply leaving less supply for COVAX and undermining COVAX purchasing power.</li></ul>      | 17 |
|                     | <ul style="list-style-type: none"><li>● Booster doses administration by HICs</li></ul>                                                                                                | 2  |
|                     | <ul style="list-style-type: none"><li>● More funding to national programs than COVAX. Eg, Operation Warp Speed by the USA.</li></ul>                                                  | 1  |
|                     | <ul style="list-style-type: none"><li>● Before the first vaccine received US FDA Authorization, more than half of the premarket purchase commitments were reserved by HICs.</li></ul> | 2  |

|                                                    |                                                                                                                                                                                                                   |   |
|----------------------------------------------------|-------------------------------------------------------------------------------------------------------------------------------------------------------------------------------------------------------------------|---|
| Lack of funding and participation of HICs to COVAX | <ul style="list-style-type: none"> <li>• Less funding to the COVAX facility than required.</li> </ul>                                                                                                             | 5 |
|                                                    | <ul style="list-style-type: none"> <li>• Three dozen countries bypassed COVAX and made huge deals with manufacturers. So not enough SFCs joined to give the collective buying power expected by COVAX.</li> </ul> | 4 |
|                                                    | <ul style="list-style-type: none"> <li>• The USA under the Trump administration didn't join COVAX which resulted in an initial lack of funding.</li> </ul>                                                        | 1 |
| Limited manufacturing capacity                     | <ul style="list-style-type: none"> <li>• the Limited number of manufacturing facilities in the world that too predominantly in the Global North.</li> </ul>                                                       | 4 |
|                                                    | <ul style="list-style-type: none"> <li>• Less manufacturing capacity in LMICs.</li> </ul>                                                                                                                         | 1 |
| Export restrictions                                | <ul style="list-style-type: none"> <li>• Export restrictions hinder the free flow of vaccines.</li> </ul>                                                                                                         | 6 |
|                                                    | <ul style="list-style-type: none"> <li>• USA invoked the Defense production Act which reduces</li> </ul>                                                                                                          | 1 |

|                             |                                                                                                                                                                                                                |             |
|-----------------------------|----------------------------------------------------------------------------------------------------------------------------------------------------------------------------------------------------------------|-------------|
|                             | the active pharma ingredient for AZ manufacture.                                                                                                                                                               |             |
| Dependency on AZ vaccine    | <ul style="list-style-type: none"> <li>The second wave in India caused reallocation of vaccines from SII to domestic usage and COVAX faced a shortfall of 190 million doses in June-July 2021.</li> </ul>      | 2           |
| Lack of technology transfer | <ul style="list-style-type: none"> <li>Limited knowledge sharing from Vaccine manufacturers.</li> </ul>                                                                                                        | 2           |
| Lack of transparency        | <ul style="list-style-type: none"> <li>Lack of transparency in manufacturing order books of Pharma companies as COVAX faced delays and pushed to the end of the queue.</li> </ul>                              | 6           |
| Dose sharing problems       | <ul style="list-style-type: none"> <li>delayed delivery of vaccines to COVAX.</li> <li>Donations earmarked</li> <li>Vaccine donations faced logistical challenges- For example, Pfizer requires UCC</li> </ul> | 1<br>1<br>1 |

|  |                                                 |  |
|--|-------------------------------------------------|--|
|  | which is not vastly available in LMICs or LICs. |  |
|--|-------------------------------------------------|--|

These gaps are elaborated with specific concerns in the following table

**Table: COVAX framework gaps and specific concerns**

| <b>Framework gaps</b>                | <b>Specific concerns</b>                                                                                                                                            | <b>Number of evidence</b> |
|--------------------------------------|---------------------------------------------------------------------------------------------------------------------------------------------------------------------|---------------------------|
| Violation of the principle of equity | Allocation cap for HIC is up to 50% of the population while for AMC it is 20%.                                                                                      | 4                         |
| Aid financing approach for LMICs     | LMICs at the mercy of HICs<br><br>COVAX FW was based on philanthropy and the will of wealthier nations that will not lead to equitable and fair access to vaccines. | 4<br><br>2                |

|                                     |                                                                                  |   |
|-------------------------------------|----------------------------------------------------------------------------------|---|
| Donation dependence                 | From a self procuring facility, COVAX was reduced to donation dependent platform | 4 |
| Allowed bilateral deals for members | All the HICs did bilateral deals outside COVAX                                   | 6 |
| COVAX AMC                           | As an approach to bypass IPR                                                     | 1 |
| Lack of transparency                | No contract details of AMC APAs                                                  | 1 |
|                                     | No transparency in negotiations with pharma companies                            | 1 |
| IP issues not addressed             | COVAX paid pharma companies from public money.                                   | 4 |
|                                     | Supported technology transfer than IP waiver                                     | 2 |
| Contractual obligations             | COVAX allocated vaccine supply to HICs despite the shortage.                     | 2 |
| Lack of representation for LMICs    | 81 % of HIC representation in COVAX governing bodies                             | 1 |

|                      |                                                                                                                   |   |
|----------------------|-------------------------------------------------------------------------------------------------------------------|---|
| Lack of coordination | CEPI was unable to secure the access provisions to ensure equitable global supply of vaccines despite investment. | 1 |
|----------------------|-------------------------------------------------------------------------------------------------------------------|---|

The above-mentioned themes are elaborated in the following table:

*Table: Global health policy gaps and specific concerns*

| <b>Policy gap Themes</b> | <b>Specific concerns</b> | <b>Number of evidence</b> |
|--------------------------|--------------------------|---------------------------|
|--------------------------|--------------------------|---------------------------|



|                     |                                                                                                                                                                                                                                                           |   |
|---------------------|-----------------------------------------------------------------------------------------------------------------------------------------------------------------------------------------------------------------------------------------------------------|---|
| Problems of WHO PAS | <ul style="list-style-type: none"><li>• Proportional allocation does not meet WHO's own ethical principles for vaccine allocation-1 Proportional allocation by WHO ignores needs-based considerations.</li></ul>                                          | 3 |
|                     | <ul style="list-style-type: none"><li>• Different regions and countries have different vaccination targets. Also, the WHO vaccine coverage target is different from the COVAX supply targets.</li></ul>                                                   | 2 |
|                     | <ul style="list-style-type: none"><li>• The logic of COVAX allocation- no country should vaccinate more than 20% of its population until all countries have vaccinated 20% of the population. Is it even possible that HICs will agree to this?</li></ul> | 2 |
|                     | <ul style="list-style-type: none"><li>• Aims to allocate doses for 20% of the population which is far less to achieve herd immunity.</li></ul>                                                                                                            | 3 |

|                                            |                                                                                                                                                   |   |
|--------------------------------------------|---------------------------------------------------------------------------------------------------------------------------------------------------|---|
| Lack of internationally binding agreements | <ul style="list-style-type: none"><li>• No enforcement of international cooperation by capping the bilateral deals.</li></ul>                     | 5 |
|                                            | <ul style="list-style-type: none"><li>• No international treaty to prevent vaccine hoarding.</li></ul>                                            | 1 |
|                                            | <ul style="list-style-type: none"><li>• No international treaties specify rights and obligations in the context of global public goods.</li></ul> | 1 |
|                                            | <ul style="list-style-type: none"><li>• No international treaty agreed to all WHO members for COVID-19 vaccines.</li></ul>                        | 2 |

|                        |                                                                                                                                                                                                                                      |   |
|------------------------|--------------------------------------------------------------------------------------------------------------------------------------------------------------------------------------------------------------------------------------|---|
| No IPR<br>TRIPS waiver | <ul style="list-style-type: none"> <li>● lack of global consensus to tackle IPR issues</li> </ul>                                                                                                                                    | 1 |
|                        | <ul style="list-style-type: none"> <li>● COVAX AMC as a way to bypass the IPR issues.</li> </ul>                                                                                                                                     | 1 |
|                        | <ul style="list-style-type: none"> <li>● COVAX framework supports more for technological transfer/sharing rather than the waiver of IPR</li> </ul>                                                                                   | 1 |
|                        | <ul style="list-style-type: none"> <li>● No waiver/suspension of IPR in WTO</li> </ul>                                                                                                                                               | 5 |
|                        | <ul style="list-style-type: none"> <li>● Vaccine nationalism and IPR gives the flawed view of Global Health and Global economy where vaccines and medications are treated as market commodities rather than public goods.</li> </ul> | 4 |
|                        | <ul style="list-style-type: none"> <li>● IPR on COVID-19 vaccines was unfair as it was mostly funded by taxpayers' money. Lack of waiver of IPR obstructs the timely access to affordable vaccines.</li> </ul>                       | 1 |
|                        | <ul style="list-style-type: none"> <li>● The discrepancy between the vision of supporting COVID-19 vaccines as public goods Vs the reality of access of LMIC to patented technology and relevant knowledge.</li> </ul>               | 1 |

|  |                                                                                                                                                                                                                      |   |
|--|----------------------------------------------------------------------------------------------------------------------------------------------------------------------------------------------------------------------|---|
|  | <ul style="list-style-type: none"><li>● TRIPS is one of the major barriers to health care equity. IPR patenting is the major obstacle for developing countries' vaccine manufacturers to enter the market.</li></ul> | 1 |
|  | <ul style="list-style-type: none"><li>● Pandemic profiteering based on the free market, profit-driven enterprise, and IPR protection is a human rights violation.</li></ul>                                          | 1 |
|  | <ul style="list-style-type: none"><li>● Patent holders determine the global supply chain of COVID-19 vaccines.</li></ul>                                                                                             | 1 |
|  | <ul style="list-style-type: none"><li>● COVAX weakened by IPR. IP rules of TRIPS agreements made it difficult to achieve international cooperation.</li></ul>                                                        | 2 |

|                               |                                                                                                                                                                                                             |   |
|-------------------------------|-------------------------------------------------------------------------------------------------------------------------------------------------------------------------------------------------------------|---|
| Global health governance gaps | <ul style="list-style-type: none"> <li>● Lack of transparency in negotiation with pharma industries</li> </ul>                                                                                              | 2 |
|                               | <ul style="list-style-type: none"> <li>● Contractual impediments by pharma companies against donation and sharing of vaccines.</li> </ul>                                                                   | 1 |
|                               | <ul style="list-style-type: none"> <li>● Paying pharma companies from public funds instead of sufficient technology sharing and local manufacturing.</li> </ul>                                             | 1 |
|                               | <ul style="list-style-type: none"> <li>● Do pharma corporations have public accountability for deciding which countries get vaccines first?. COVID-19 Vaccine deals are not transparent.</li> </ul>         | 1 |
|                               | <ul style="list-style-type: none"> <li>● Power rests with a few pharma companies controlling the supply and distribution of vaccines. Companies decide how to prioritize supply between nations.</li> </ul> | 2 |
|                               | <ul style="list-style-type: none"> <li>● Current global health architecture and existing regulations are inefficient to safeguard equity.</li> </ul>                                                        | 1 |
|                               | <ul style="list-style-type: none"> <li>● No mechanisms for Vaccine price controls or regulations that would cap or set the prices.</li> </ul>                                                               |   |

|  |  |   |
|--|--|---|
|  |  | 1 |
|--|--|---|
